# Supplementary material for: Housing, Husbandry, and Clinical Techniques for Crayfish (Procambarus clarkii) used in Biomedical Research
Source: Research Square preprint supplement (doi:10.21203/rs.3.rs-374739/v1), 2021-04-16
Supplement: Supplementary file 2 [file 41b09ea3f94df33aef294225.xlsx]

## Sheet: summary stats
	ID	Mean	Std dev		ID	Mean	Std dev		ID	Mean	Std dev		ID	Mean	Std dev		ID	Mean	Std dev		ID	Mean	Std dev		ID	Mean	Std dev		ID	Mean	Std dev		ID	Mean	Std dev		ID	Mean	Std dev
Temp (F°)	1A	71.6588	0.924026	pH	1A	7.77765	0.286826	Conductivity	1A	351.412	79.8781	TDS	1A	246.882	56.6049	Salinity	1A	0.170588	0.0243594	Ammonia	1A	0.985294	0.941535	Nitrite	1A	2.38235	2.34207	Nitrate	1A	5	6.61438	GH	1A	148.465	18.736	KH	1A	61.0706	11.0684
	1B	71.6667	1.0992		1B	7.90167	0.213576		1B	366.556	26.1719		1B	267	29.7183		1B	0.183889	0.0133456		1B	2.09722	2.53235		1B	2.41667	2.42687		1B	14.7222	22.0609		1B	164.089	17.6458		1B	75.5778	20.8708
	1C	71.9118	0.855046		1C	7.99353	0.135275		1C	346.647	24.1556		1C	245	16.1826		1C	0.169412	0.0119742		1C	0.764706	0.767863		1C	2.64706	2.37016		1C	5.58824	7.68162		1C	162.153	21.4339		1C	67.3882	11.8894
	1D	71.6471	0.952705		1D	7.96588	0.183441		1D	358.059	23.855		1D	241.835	64.9387		1D	0.182353	0.0225082		1D	1.07353	1.27096		1D	2.35294	2.37016		1D	6.47059	8.2471		1D	158.862	21.5545		1D	60.0176	12.5638
	1E	71.9471	1.01126		1E	8.01412	0.11314		1E	341.294	25.416		1E	244.824	17.1946		1E	0.172941	0.0126317		1E	0.941176	0.80297		1E	2.47059	2.47784		1E	6.76471	10.7444		1E	155.841	20.7547		1E	69.4941	15.3491
	1F	72.2706	0.911568		1F	7.99824	0.119229		1F	336.824	37.0392		1F	234.529	25.8		1F	0.170588	0.0143486		1F	0.985294	1.25147		1F	2.66176	2.35342		1F	5.88235	6.18347		1F	156.888	22.4013		1F	69.4941	12.4697
	2A	68.0082	15.6526		2A	8.03	0.245306		2A	318.529	36.1077		2A	230.235	16.3115		2A	0.162941	0.0131171		2A	0.676471	0.629761		2A	1.94118	2.34942		2A	4.11765	5.65555		2A	151.624	25.4073		2A	58.9647	13.8142
	2B	71.9059	0.747053		2B	8.04353	0.153295		2B	336.176	26.2993		2B	239.471	18.9444		2B	0.167059	0.0140378		2B	0.529412	0.642762		2B	2.16176	2.24816		2B	4.70588	4.83173		2B	163.206	20.8771		2B	71.6	16.7439
	2C	71.7529	0.958591		2C	7.98294	0.173124		2C	380.471	58.483		2C	270.824	41.6402		2C	0.188824	0.0280362		2C	0.838235	0.770253		2C	2.13235	2.48451		2C	10	19.685		2C	166.365	21.7069		2C	57.9118	13.4688
	2D	71.8824	0.773979		2D	7.99529	0.0875441		2D	304.824	36.7768		2D	217.176	26.425		2D	0.152353	0.0182104		2D	0.573529	0.402771		2D	1.97059	2.35996		2D	5.58824	7.88241		2D	150.588	24.5394		2D	61.1412	12.815
	2E	72.0647	0.803851		2E	8.07588	0.116729		2E	344.765	22.4542		2E	244.412	15.9141		2E	0.171176	0.0111144		2E	0.75	0.71261		2E	2.39706	2.32691		2E	5.29412	10.3789		2E	172.682	21.8691		2E	63.1765	11.1743
	2F	72.1176	0.854572		2F	8.07706	0.089775		2F	344.588	23.3748		2F	239.529	31.139		2F	0.171765	0.0118508		2F	0.882353	0.82971		2F	2.27941	2.39772		2F	3.82353	5.45705		2F	171.571	23.6638		2F	64.2294	12.7499
	3A	71.8	0.934077		3A	8.08412	0.145433		3A	310.059	25.9699		3A	219.059	20.0608		3A	0.156471	0.0111474		3A	0.75	0.684653		3A	2.38235	2.34207		3A	5.58824	6.58653		3A	154.782	21.8691		3A	56.8588	9.46184
	3B	71.8824	1.08353		3B	7.87294	0.160108		3B	299.941	23.0501		3B	213.706	16.5558		3B	0.151176	0.0126897		3B	0.632353	0.625735		3B	2	2.33854		3B	9.41176	19.3554		3B	153.729	23.7292		3B	51.5941	8.68278
	3C	71.9588	0.998786		3C	7.96412	0.185811		3C	306.294	16.112		3C	218.118	11.3075		3C	0.154706	0.00799816		3C	0.529412	0.39412		3C	2.19118	2.43594		3C	4.70588	5.44018		3C	150.571	16.8141		3C	55.8059	10.7444
	3D	71.8882	1.04814		3D	7.99765	0.148431		3D	347.412	22.1981		3D	246.824	15.7569		3D	0.175882	0.0117574		3D	1.30882	1.41291		3D	2.11765	2.48922		3D	5	6.84653		3D	166.365	18.736		3D	72.6576	11.7819
	3E	71.7706	1.03909		3E	7.96765	0.143114		3E	306.765	19.2078		3E	218.765	13.9577		3E	0.154706	0.0117886		3E	0.764706	0.692993		3E	2.22059	2.41719		3E	6.17647	7.40131		3E	144.253	17.2976		3E	58.9647	13.8142
	3F	71.9235	1.02624		3F	7.94588	0.169154		3F	330.765	21.0105		3F	235.647	15.2641		3F	0.166471	0.0111474		3F	0.647059	0.61909		3F	2.33824	2.3501		3F	6.76471	10.146		3F	164.259	19.2324		3F	65.2824	14.0677
	4A	71.9294	0.960966		4A	8.00529	0.127775		4A	336.353	22.0906		4A	240.941	15.5823		4A	0.17	0.011726		4A	0.558824	0.569604		4A	2.73529	2.48821		4A	7.05882	7.08405		4A	150.571	19.0478		4A	64.2294	17.9657
	4B	71.8647	1.06063		4B	8.04706	0.148314		4B	340.176	45.4316		4B	250.294	21.1565		4B	0.176471	0.0149755		4B	0.955882	1.26007		4B	2.07353	2.31126		4B	6.17647	7.40131		4B	160.571	20.6202		4B	68.4412	17.023
	4C	71.8059	0.929025		4C	8.08765	0.0840037		4C	331.059	41.2515		4C	239.529	19.6377		4C	0.169412	0.0124853		4C	0.544118	0.43513		4C	1.94118	2.37587		4C	5.88235	7.54886		4C	153.729	24.5586		4C	63.1765	9.20947
	4D	71.9471	1.07012		4D	7.97941	0.120181		4D	326	36.5086		4D	231.706	13.7739		4D	0.162941	0.00985184		4D	0.617647	0.396446		4D	2.26471	2.38562		4D	5.58824	7.47545		4D	152.676	23.7788		4D	58.9647	8.40706
	4E	71.8059	1.04132		4E	7.93588	0.297617		4E	382.647	66.4633		4E	272.882	46.0623		4E	0.192941	0.0334971		4E	0.544118	0.333486		4E	2.08824	2.51238		4E	5	7.07107		4E	172.682	30.9657		4E	52.6471	13.3811
	4F	71.6706	0.949187		4F	8.08882	0.084401		4F	329.118	23.9267		4F	235.765	17.2718		4F	0.165882	0.0117574		4F	0.779412	0.794917		4F	2.36765	2.35538		4F	8.52941	11.4243		4F	158.994	23.5798		4F	69.4941	13.9837
		71.7117	0.802537			7.99301	0.0737173			336.531	22.2942			239.373	15.9279			0.169206	0.0109472			0.822066	0.337557			2.27226	0.22354			6.40999	2.32649			158.563	7.92223			63.2576	6.34198

## Sheet: 1A
	Tank: 1A
	Temp (F°)	pH	Conductivity	TDS	Salinity	Ammonia	Nitrite	Nitrate	GH	KH
Day 0	72.7	8.3	640	454	0.25	0.25	0	0	179	71.6
Day 1	73	7.97	305	216	0.15	0.5	0	0	179	71.6		Mean	Stand Dev
Day 2	72.5	7.66	310	220	0.16	1	0	0	143.2	71.6	Temp (F°)	71.6588	0.924026
Day 3	72.5	7.66	310	220	0.16	0.5	0	0	143.2	53.7	pH	7.77765	0.286826
Day 4	71.2	7.51	305	215	0.15	0.5	0	0	143.2	71.6	Conductivity	351.412	79.8781
Day 5	72.5	7.74	312	222	0.16	1	0	0	161.1	71.6	TDS	246.882	56.6049
Day 6	71.1	8.02	316	223	0.16	2	0.5	0	161.1	71.6	Salinity	0.170588	0.0243594
Day 7	72	7.75	321	227	0.16	2	2	5	125.3	71.6	Ammonia	0.985294	0.941535
Day 8	72.5	7.24	302	212	0.15	1	1	0	143.2	53.7	Nitrite	2.38235	2.34207
Day 9	70.2	7.35	331	235	0.16	1	2	5	143.2	53.7	Nitrate	5	6.61438
Day 10	72.1	7.6	363	258	0.18	4	5	5	179	53.7	GH	148.465	18.736
Day 11	71.1	7.6	380	272	0.19	1	5	10	161.1	71.6	KH	61.0706	11.0684
Day 12	72.1	8.09	379	269	0.19	0.5	5	20	125.3	53.7
Day 13	70.9	7.65	317	223	0.16	0.5	5	5	143.2	35.8
Day 14	70.3	7.95	333	234	0.16	0.5	5	20	125.3	53.7
Day 15	70.3	8.03	383	252	0.18	0.25	5	5	143.2	53.7
Day 37	71.2	8.1	367	245	0.18	0.25	5	10	125.3	53.7

## Sheet: 1B
	Tank: 1B
	Temp (F°)	pH	Conductivity	TDS	Salinity	Ammonia	Nitrite	Nitrate	GH	KH
Day 0	73.4	8.35	329	233	0.16	0	0	0	161.1	71.6
Day 1	72.9	7.74	338	240	0.17	0.5	0	0	197	71.6		Mean	Stand Dev
Day 2	72.5	7.57	363	358	0.18	2	0	0	179	89.5	Temp (F°)	71.6667	1.0992
Day 3	72.7	7.69	359	255	0.18	2	0	0	143.2	71.6	pH	7.90167	0.213576
Day 4	72	7.75	379	268	0.19	4	0	0	143.2	89.5	Conductivity	366.556	26.1719
Day 5	72.3	7.89	392	278	0.2	4	0	0	179	107.4	TDS	267	29.7183
Day 6	71.1	8	394	280	0.2	8	0	0	179	107.4	Salinity	0.183889	0.0133456
Day 7	72.5	7.91	380	269	0.19	8	0.5	5	179	107.4	Ammonia	2.09722	2.53235
Day 8	72.5	7.67	327	233	0.16	1	1	0	143.2	53.7	Nitrite	2.41667	2.42687
Day 9	70.5	7.74	358	254	0.18	1	2	5	143.2	53.7	Nitrate	14.7222	22.0609
Day 10	72.1	7.82	388	276	0.19	4	5	10	179	71.6	GH	164.089	17.6458
Day 11	71.1	7.79	398	283	0.2	1	5	40	179	89.5	KH	75.5778	20.8708
Day 12	72	7.85	405	288	0.2	0.5	5	20	161.1	71.6
Day 13	70.9	7.86	329	235	0.17	0.5	5	5	143.2	35.8
Day 14	70.2	8.08	332	236	0.17	0.5	5	40	143.2	53.7
Day 15	70.9	8.13	371	263	0.19	0.25	5	80	179	53.7
Day 37	69.1	8.22	387	274	0.19	0.25	5	20	161.1	89.5
Day 37	71.3	8.17	369	283	0.19	0.25	5	40	161.1	71.6

## Sheet: 1C
	Tank: 1B
	Temp (F°)	pH	Conductivity	TDS	Salinity	Ammonia	Nitrite	Nitrate	GH	KH
Day 0	73.2	8.3	325	231	0.16	0.25	0	0	179	53.7
Day 1	73.2	7.91	306	219	0.15	0.5	0	0	161.1	71.6		Mean	Stand Dev
Day 2	72.5	7.91	340	241	0.17	1	0	0	179	71.6	Temp (F°)	71.9118	0.855046
Day 3	72.7	7.97	328	233	0.16	1	0	0	143.2	71.6	pH	7.99353	0.135275
Day 4	72.1	7.98	341	242	0.17	2	0	0	143.2	71.6	Conductivity	346.647	24.1556
Day 5	72.3	8.03	345	245	0.17	2	0	0	179	71.6	TDS	245	16.1826
Day 6	71.4	8.11	343	243	0.17	2	1	5	179	89.5	Salinity	0.169412	0.0119742
Day 7	72.3	8.02	361	256	0.18	2	2	5	179	89.5	Ammonia	0.764706	0.767863
Day 8	72.5	7.72	326	231	0.16	0.5	2	0	125.3	53.7	Nitrite	2.64706	2.37016
Day 9	70.9	7.81	349	248	0.17	0.5	5	5	143.2	53.7	Nitrate	5.58824	7.68162
Day 10	72.3	8.03	368	262	0.18	0.5	5	10	179	71.6	GH	162.153	21.4339
Day 11	71.1	7.95	380	269	0.19	0.5	5	20	196.9	71.6	KH	67.3882	11.8894
Day 12	72	7.96	385	274	0.19	0	5	20	179	53.7
Day 13	70.9	7.87	306	216	0.15	0.25	5	0	161.1	53.7
Day 14	70.2	8.12	344	245	0.17	0	5	10	125.3	71.6
Day 15	71.1	8.13	368	261	0.18	0	5	0	143.2	53.7
Day 37	71.8	8.07	378	249	0.16	0	5	20	161.1	71.6

## Sheet: 1D
	Tank: 1A
	Temp (F°)	pH	Conductivity	TDS	Salinity	Ammonia	Nitrite	Nitrate	GH	KH
Day 0	73	8.27	370	0.19	0.25	0.25	0	0	196.9	71.6
Day 1	73.2	7.5	372	266	0.19	1	0	0	"13"	71.6		Mean	Stand Dev
Day 2	72.7	7.85	383	280	0.2	2	0	0	179	71.6	Temp (F°)	71.6471	0.952705
Day 3	72.5	8.02	343	244	0.17	1	0	0	143.2	53.7	pH	7.96588	0.183441
Day 4	71.8	8.08	341	242	0.17	1	0	0	143.2	53.7	Conductivity	358.059	23.855
Day 5	72.1	8.04	352	257	0.18	2	0	0	143.2	71.6	TDS	241.835	64.9387
Day 6	70.7	8.09	356	253	0.18	4	1	0	179	71.6	Salinity	0.182353	0.0225082
Day 7	71.8	8.04	360	258	0.18	4	2	5	161.1	71.6	Ammonia	1.07353	1.27096
Day 8	72.5	7.88	337	240	0.17	1	2	0	143.2	53.7	Nitrite	2.35294	2.37016
Day 9	70.2	7.97	368	262	0.18	1	5	5	161.1	71.6	Nitrate	6.47059	8.2471
Day 10	72	8.07	399	284	0.2	0.5	5	20	179	53.7	GH	158.862	21.5545
Day 11	70.9	8.07	367	261	0.18	0	5	20	161.1	53.7	KH	60.0176	12.5638
Day 12	71.6	8.07	395	282	0.2	0	5	20	179	53.7
Day 13	71.1	7.67	308	219	0.15	0.25	5	5	125.3	35.8
Day 14	70.2	7.98	321	228	0.16	0	5	20	125.3	35.8
Day 15	71.1	8.05	362	257	0.18	0.25	0	5	179	53.7
Day 37	70.6	7.77	353	278	0.16	0	5	10	143.2	71.6

## Sheet: 1E
	Tank: 1A
	Temp (F°)	pH	Conductivity	TDS	Salinity	Ammonia	Nitrite	Nitrate	GH	KH
Day 0	73.4	8.25	304	216	0.15	0	0	0	179	71.6
Day 1	73.9	7.96	322	228	0.16	1	0	0	179	71.6		Mean	Stand Dev
Day 2	73	7.89	333	236	0.17	1	0	0	179	71.6	Temp (F°)	71.9471	1.01126
Day 3	72.5	8.07	330	234	0.16	1	0	0	125.3	71.6	pH	8.01412	0.11314
Day 4	72.1	8.06	335	243	0.17	1	0	0	125.4	71.6	Conductivity	341.294	25.416
Day 5	72.5	8.12	352	249	0.18	2	0	0	179	89.5	TDS	244.824	17.1946
Day 6	71.4	8.1	355	252	0.18	2	0	0	179	107.4	Salinity	0.172941	0.0126317
Day 7	72	8.11	352	250	0.18	2	1	5	179	89.5	Ammonia	0.941176	0.80297
Day 8	72.9	7.92	335	238	0.17	1	1	0	143.2	53.7	Nitrite	2.47059	2.47784
Day 9	70.5	8.01	352	249	0.18	2	5	5	143.2	53.7	Nitrate	6.76471	10.7444
Day 10	72.3	8.02	363	261	0.18	2	5	5	143.2	53.7	GH	155.841	20.7547
Day 11	71.1	8.02	386	274	0.19	0.5	5	20	161.1	71.6	KH	69.4941	15.3491
Day 12	71.8	8.04	393	279	0.2	0	5	40	161.1	71.6
Day 13	71.2	7.74	310	220	0.16	0.25	5	5	143.2	53.7
Day 14	70.5	7.96	322	229	0.16	0	5	10	125.3	53.7
Day 15	71.2	8.05	351	250	0.18	0.25	5	5	143.2	53.7
Day 37	70.8	7.92	307	254	0.17	0	5	20	161.1	71.6

## Sheet: 1F
	Tank: 1A
	Temp (F°)	pH	Conductivity	TDS	Salinity	Ammonia	Nitrite	Nitrate	GH	KH
Day 0	73.8	8.22	304	216	0.15	0	0	0	179	71.6
Day 1	73.9	8.01	317	227	0.16	0.5	0	0	196.9	71.6		Mean	Stand Dev
Day 2	73.4	7.96	312	222	0.16	1	0	0	161.1	71.6	Temp (F°)	72.2706	0.911568
Day 3	72.9	8.04	330	235	0.17	1	0	0	143.2	71.6	pH	7.99824	0.119229
Day 4	72.5	8	329	233	0.16	1	0	0	143.2	71.6	Conductivity	336.824	37.0392
Day 5	72.5	8.02	348	247	0.17	2	0.25	5	161.1	89.5	TDS	234.529	25.8
Day 6	71.6	8.12	354	251	0.18	4	1	5	161.1	71.6	Salinity	0.170588	0.0143486
Day 7	72.7	8.07	259	256	0.18	4	2	5	179	89.5	Ammonia	0.985294	1.25147
Day 8	72	7.74	331	248	0.17	1	2	5	143.2	53.7	Nitrite	2.66176	2.35342
Day 9	71.2	7.88	359	255	0.18	1	5	5	143.2	71.6	Nitrate	5.88235	6.18347
Day 10	72	8.04	370	263	0.19	0.25	5	10	179	53.7	GH	156.888	22.4013
Day 11	71.6	8.05	390	177	0.19	0.25	5	20	179	71.6	KH	69.4941	12.4697
Day 12	72	8.04	392	279	0.2	0.25	5	20	179	89.5
Day 13	72	7.74	300	214	0.15	0.25	5	5	125.3	53.7
Day 14	70.5	8.02	320	227	0.16	0.25	5	5	125.3	53.7
Day 15	71.4	8	397	246	0.17	0	5	5	125.3	53.7
Day 37	72.6	8.02	314	191	0.16	0	5	10	143.2	71.6

## Sheet: 2A
	Tank: 1A
	Temp (F°)	pH	Conductivity	TDS	Salinity	Ammonia	Nitrite	Nitrate	GH	KH
Day 0	7.34	8.16	214	221	0.16	0	0	0	196.9	71.6
Day 1	73.6	8.01	287	206	0.14	0.5	0	0	179	71.6		Mean	Stand Dev
Day 2	72.7	8.08	291	205	0.14	1	0	0	179	71.6	Temp (F°)	68.0082	15.6526
Day 3	72.3	8.11	317	225	0.16	1	0	0	125.3	53.7	pH	8.03	0.245306
Day 4	72.1	8.29	319	227	0.16	0.5	0	0	125.3	71.6	Conductivity	318.529	36.1077
Day 5	72.3	8.2	336	239	0.17	1	0	0	161.1	71.6	TDS	230.235	16.3115
Day 6	71.2	8.27	335	238	0.17	2	0.25	0	161.1	71.6	Salinity	0.162941	0.0131171
Day 7	72.1	8.19	338	240	0.17	2	1	5	161.1	71.6	Ammonia	0.676471	0.629761
Day 8	71.8	7.36	308	218	0.15	0.5	0.5	0	125.3	35.8	Nitrite	1.94118	2.34942
Day 9	71.2	7.59	337	239	0.17	1	1	0	143.2	53.7	Nitrate	4.11765	5.65555
Day 10	72	8.16	354	252	0.18	1	5	5	161.1	53.7	GH	151.624	25.4073
Day 11	71.4	8.11	367	261	0.18	0.5	5	10	161.1	71.6	KH	58.9647	13.8142
Day 12	71.8	8.14	364	249	0.18	0.25	5	20	179	53.7
Day 13	71.8	7.79	300	212	0.15	0.25	5	5	125.3	35.8
Day 14	70.3	8.09	303	216	0.15	0	5	10	107.4	53.7
Day 15	71.6	8.06	338	241	0.17	0	0.25	5	161.1	53.7
Day 37	70.6	7.9	307	225	0.17	0	5	10	125.3	35.8

## Sheet: 2B
	Tank: 1A
	Temp (F°)	pH	Conductivity	TDS	Salinity	Ammonia	Nitrite	Nitrate	GH	KH
Day 0	73	8.22	323	229	0.16	0	0	0	196.9	89.5
Day 1	73.4	8.05	307	218	0.15	0.5	0	0	179	89.5		Mean	Stand Dev
Day 2	72.9	8.1	305	217	0.15	0.5	0	0	179	71.6	Temp (F°)	71.9059	0.747053
Day 3	72.3	8.17	322	229	0.16	0.5	0	0	143.2	89.5	pH	8.04353	0.153295
Day 4	72.1	8.19	332	235	0.17	1	0	0	143.2	71.6	Conductivity	336.176	26.2993
Day 5	72.3	8.17	340	243	0.17	1	0.25	0	179	89.5	TDS	239.471	18.9444
Day 6	71.1	8.25	322	229	0.16	2	0.5	0	143.2	89.5	Salinity	0.167059	0.0140378
Day 7	71.6	8.18	324	233	0.16	2	2	5	161.1	89.5	Ammonia	0.529412	0.642762
Day 8	71.6	7.82	324	230	0.16	0.5	1	0	143.2	53.7	Nitrite	2.16176	2.24816
Day 9	71.2	7.88	395	281	0.2	0.5	2	5	161.1	53.7	Nitrate	4.70588	4.83173
Day 10	72.1	7.84	377	268	0.19	0	5	10	196.9	71.6	GH	163.206	20.8771
Day 11	71.2	8.09	368	261	0.18	0	5	10	179	71.6	KH	71.6	16.7439
Day 12	71.8	8.01	361	257	0.18	0.25	5	10	161.1	71.6
Day 13	72.1	7.75	304	216	0.15	0.25	5	10	125.3	35.8
Day 14	70.5	7.91	318	226	0.16	0	5	10	143.2	53.7
Day 15	71.4	8.08	345	245	0.17	0	1	10	179	71.6
Day 37	71.8	8.03	348	254	0.17	0	5	10	161.1	53.7

## Sheet: 2C
	Tank: 1A
	Temp (F°)	pH	Conductivity	TDS	Salinity	Ammonia	Nitrite	Nitrate	GH	KH
Day 0	73	8.19	302	215	0.15	0	0	0	179	71.6
Day 1	73.4	7.93	292	207	0.15	0.5	0	0	196.9	71.6		Mean	Stand Dev
Day 2	72.9	7.96	282	201	0.14	2	0	0	179	53.7	Temp (F°)	71.7529	0.958591
Day 3	72.7	8.06	324	231	0.16	1	0	0	161.1	53.7	pH	7.98294	0.173124
Day 4	72.1	8.33	367	261	0.18	2	0	0	161.1	71.6	Conductivity	380.471	58.483
Day 5	72	7.56	428	305	0.21	1	0	0	125.3	35.8	TDS	270.824	41.6402
Day 6	70.9	7.88	448	318	0.22	2	0	0	161.1	35.8	Salinity	0.188824	0.0280362
Day 7	71.4	7.91	465	332	0.23	2	0	0	161.1	35.8	Ammonia	0.838235	0.770253
Day 8	71.8	7.84	384	273	0.19	1	0.25	0	143.2	53.7	Nitrite	2.13235	2.48451
Day 9	71.1	7.93	405	288	0.2	1	1	0	179	53.7	Nitrate	10	19.685
Day 10	71.8	8.03	423	301	0.21	1	5	20	179	71.6	GH	166.365	21.7069
Day 11	71.2	8.03	443	315	0.22	0.25	5	20	196.9	71.6	KH	57.9118	13.4688
Day 12	72	8.05	446	316	0.22	0.25	5	10	196.9	71.6
Day 13	71.8	7.81	339	241	0.17	0.25	5	10	143.2	53.7
Day 14	70.9	7.94	365	260	0.18	0	5	80	143.2	53.7
Day 15	71.4	8.08	354	252	0.18	0	5	20	179	53.7
Day 37	69.4	8.18	401	288	0.2	0	5	10	143.2	71.6

[truncated: 15 more sheets: 2D, 2E, 2F, 3A, 3B, 3C, 3D, 3E, 3F, 4A, 4B, 4C, 4D, 4E, 4F]
