# Supplementary material for: Housing, Husbandry, and Clinical Techniques for Crayfish (Procambarus clarkii) used in Biomedical Research
Source: Research Square preprint supplement (doi:10.21203/rs.3.rs-374739/v1), 2021-04-16
Supplement: Supplementary file 3 [file 2545bc1606a8d9ee04425a11.xlsx]

## Sheet: summary stats
Propofol emersion data
n=16
	Time to sedation(min)	full recovery time(min)	mortality
Mean	63.9756	7.37688	0
std dev	1.38993	2.35869	0
median
Propofol injection data
	These crayfish became fully sedated
	12 females, 7 males
n=19
	Time to sedation(min)	full recovery time(min)	mortality
Mean	0.277149	164.499	0.157895
std dev	0.273047	77.2882	0.360555
MS-222 emersion
MS-222 had no observable effect on the crayfish
the relevant data is in the 4th sheet
immersion			inj
Time to sedation(min)	full recovery time(min)	mortality	Time to sedated (min)	full recovery from sedation time(min)	Mortality 24 hr
61.02	8.67	no	0.3333	74.6	no
61.12	7.83	no	1.2	260	yes
63.13	8.42	no	0.166667	260	no
63.2	7.93	no	0.72	214.65	no
63.6	8.07	no	0.466667	260	yes
63.7	8.07	no	0.116667	260	no
63.95	7.93	no	0.3	260	no
64.1	7.87	no	0.16667	89.77	no
64.55	7.48	no	0.15	112.67	no
64.27	4.17	no	0.25	109.92	no
64.67	9.58	no	0.14	260	yes
64.33	4.23	no	0.113333	165.478	no
65.07	12.88	no	0.076667	83.405	no
65.45	4.03	no	0.125	139.305	no
65.83	6.95	no	0.1795	104.488	no
65.62	3.92	no	0.15317	80.8319	no
			0.359867	99.5852	no
			0.125	81.375	no
			0.12333	209.404	no

## Sheet: Prop emersion
crawdad	mortality	start time	end time	Time to sedation(min)	full recovery time(min)	****seconds have been converted to decimal in minutes***
1	no	08:34:00	09:35:03	61.02	8.67
2	no	08:34:00	09:35:07	61.12	7.83
4	no	08:34:00	09:37:08	63.13	8.42
3	no	08:34:00	09:37:12	63.2	7.93
5	no	08:34:00	09:37:36	63.6	8.07
6	no	08:34:00	09:37:42	63.7	8.07
7	no	08:34:00	09:37:57	63.95	7.93
8	no	08:34:00	09:38:06	64.1	7.87
9	no	08:34:00	09:38:33	64.55	7.48
10	no	08:34:00	09:38:16	64.27	4.17
11	no	08:34:00	09:38:40	64.67	9.58
12	no	08:34:00	09:38:20	64.33	4.23
13	no	08:34:00	06:39:04	65.07	12.88
14	no	08:34:00	09:39:27	65.45	4.03
15	no	08:34:00	09:39:50	65.83	6.95
16	no	08:34:00	09:39:37	65.62	3.92
mean	0		Mean	63.9756	7.37688
			std dev	1.38993	2.35869
	f		median	64.185	7.9

## Sheet: Prop injection
crawdad	Mortality 24 hr	weight	dose (100mg/kg)	injected time	anesthetized time	Fully recovered (righted) time	Time to sedated (min)	time to sedation (sec)	full recovery from sedation time(min)	****seconds have been converted to decimal in minutes***
1F	no	14	0.14	10:50:14	10:50:34	12:05:10	0.3333	19.8	74.6
2A	yes	14	0.14	10:36:00	10:37:12	15:11:00	1.2	72	260
2B	no	17	0.17	10:38:14	10:38:24	15:11:00	0.166667	10	260
2C	no	18	0.18	10:40:39	10:41:22	14:16:00	0.72	43.2	214.65
2D	yes	14	0.14	10:24:50	10:43:18	15:11:00	0.466667	28	260
2E	no	14	0.14	10:47:16	10:47:23	15:11:00	0.116667	7	260
2F	no	23	0.23	10:49:00	10:49:18	15:11:00	0.3	18	260
3A	no	17	0.17	10:32:09	10:32:19	01:02:05	0.16667	10	89.77
3B	no	13	0.13	10:34:15	10:34:24	12:27:04	0.15	9	112.67
3C	no	11	0.11	10:37:00	10:37:15	12:27:10	0.25	15	109.92
3D	yes	10	0.1	10:44:00	10:44:08:4	15:11:00	0.14	8.4	260
3E	no	14	0.14	10:42:12	10:42:18:8	01:27:46	0.113333	7	165.478
3F	no	14	0.14	10:43:38	10:43:42:6	12:07:06	0.076667	4.6	83.405
4A	no	16	0.16	10:48:17	10:48:24:5	01:07:42	0.125	7.5	139.305
4B	no	13	0.13	10:57:01	10:57:11:77	12:41:40	0.1795	10.77	104.488
4C	no	16	0.16	10:53:19	10:53:28:19	12:14:18	0.15317	9.19	80.8319
4D	no	13	0.13	10:54:00	10:54:21:52	12:33:56	0.359867	21.52	99.5852
4E	no	13	0.13	10:52:03	10:52:10:5	12:13:32	0.125	7.8	81.375
4F	no	14	0.14	10:50:42	10:50:49:4	14:20:13	0.12333	7.4	209.404
	yes=dead					Mean	0.277149	16.6411	164.499
	no=alive					std dev	0.273047	16.3636	77.2882
mean	0.157895	14.6316	0.146316			Range	1.12333	67.4	185.4
std dev		2.83256	0.0283256			max	1.2	72	260
Range		13	0.13			min	0.076667	4.6	74.6
max		23	0.23			Median	0.166667	10	139.305
min		10	0.1
variance	0.132968

## Sheet: MS-222 emersion
ID	weight	Gender	dose(mg/L)	time to sedation
1	52.22	M	50	NOE	NOE= no obervable effect
2	41.76	M	50	NOE
3	25.49	M	50	NOE
4	28.55	M	50	NOE
5	13.95	F	50	NOE
6	16.37	F	50	NOE
7	16.61	F	50	NOE
8	23.81	F	50	NOE
9	38.5	F	150	NOE
10	44.38	F	150	NOE
11	23.6	F	150	NOE
12	32.99	F	150	NOE
13	26.28	M	150	NOE
14	14.7	M	150	NOE
15	15.13	M	150	NOE
16	17.58	M	150	NOE
mean	26.995
std dev	11.8974
